# Supplementary material
Source: publisher figshare collection journal article supplement (https://wiley.figshare.com/ndownloader/files/33826412)
Supplement: Supplementary file 1 [file 33826412]

## Sheet: Sheet1
Date	Hg	Se	Zn	Cd	Pb	As	Cr	Cu
2005-01-15	0.0263125	0.576429	92.17	3.98	1.95	15.74	3.13	4.69
2005-02-15	0.023375	0.416929	69.04	3.18	3.72	17.23	3.73	5.74
2005-03-15	0.032875	0.359286	57.02	2.29	0.989375	15.73	3.13	4.34
2005-04-15	0.026125	0.8315	34.43	1.92	3.03	12.71	2.67	5.21
2005-05-15	0.0264375	0.201714	37.19	1.83	2.35	15.85	3.91	39.85
2005-06-15	0.0266	0.354385	41.85	1.16	1.24	12.01	2.93	4.87
2005-07-15	0.0228125	0.330714	50.57	1.68	1.66	13.05	2.54	7.83
2005-08-15	0.022875	0.457357	27.45	1.44	1.03	18.55	2.98	3.7
2005-09-15	0.03825	0.572286	37.29	1.29	0.795687	13.13	2.5	3.51
2005-10-15	0.0249375	0.583357	30.98	1.84	1.38	13.47	2.5	4.37
2005-11-15	0.030625	0.673714	52.89	2.11	1.88	12.53	2.5	4.22
2005-12-15	0.0290714	0.812857	65.21	2.24	1.7	21.9	2.5	5.75
2006-01-15	0.0297143	0.679286	71.92	5.63	1.23	21.14	2.5	4.94
2006-02-15	0.0236429	0.473286	61.72	2.14	1.67	10.55	2.5	4.85
2006-03-15	0.039	0.361571	29.54	1.11	2.31	13.31	2.63	7.53
2006-04-15	0.02125	0.356357	19.76	0.923	1.76	13.63	2.5	7.57
2006-05-15	0.0259375	0.266714	28.03	0.84825	2.02	17.08	2.92	3.68
2006-06-15	0.0245882	0.357267	18.34	0.796294	2.77	16.15	3.28	4.67
2006-07-15	0.0245882	0.425933	12.95	0.785588	2.26	8.27	2.59	4.46
2006-08-15	0.0223529	0.370733	29.25	1.2	3.86	21.75	2.59	4.98
2006-09-15	0.0288824	0.4058	22.69	0.891813	2.22	10.84	2.59	4.35
2006-10-15	0.0238235	0.4062	16.49	0.652176	1.11	11.07	3.09	3.92
2006-11-15	0.0227059	0.430533	18.19	1.08	2.73	14.2	2.82	4.05
2006-12-15	0.0238667	0.3564	30.81	1.2	1.3	12.23	2.71	6.28
2007-01-15	0.034	0.359467	85.52	2.86	1.22	8.34	2.59	4.57
2007-02-15	0.0261765	0.502067	50.49	1.13	1.64	14.75	2.35	5.1
2007-03-15	0.0281765	0.262467	28.86	0.953867	2.49	14.5	2.35	4.52
2007-04-15	0.0252941	0.235933	18.64	0.638933	1.09	11.77	2.35	4.26
2007-05-15	0.0267059	0.252333	19.49	0.594933	1.59	14.54	2.35	4.18
2007-06-15	0.0258824	0.311067	69.57	0.523933	1.23	11.88	2.35	3.77
2007-07-15	0.025	0.329067	11.46	0.427133	1.57	10.29	2.35	4.75
2007-08-15	0.0279412	0.288933	13.08	0.378882	1.19	11.89	2.35	4.08
2007-09-15	0.0221176	0.2798	11.11	0.612706	1.39	11.5	2.35	4.26
2007-10-15	0.0248824	0.229667	27.23	0.741529	1.43	9.83	2.35	4.83
2007-11-15	0.0248824	0.3506	15.66	0.598471	0.753941	9.91	2.35	6.19
2007-12-15	0.0250588	0.5472	27.15	1.23	1.35	11.16	2.35	4.61
2008-01-15	0.0228235	0.415	42.97	0.847118	2.34	12.84	2.35	9.21
2008-02-15	0.0228235	0.368333	29.85	1.39	0.937706	14.75	2.35	4.55
2008-03-15	0.0276667	0.297733	21.52	1.44	1.81	11.59	2.71	5.56
2008-04-15	0.0258	0.899467	23.1	0.510353	1.08	13.85	2.35	4.05
2008-05-15	0.0261538	0.3556	11.46	0.585765	1	12.5	2.35	3.94
2008-06-15	0.0277647	1.44	11.01	0.679471	1.34	16.54	3.06	5.71
2008-07-15	0.0320588	1.5	24.48	0.429412	1.51	14.86	2.88	4.79
2008-08-15	0.0294118	0.796588	22.57	0.443059	1.43	9.98	2.68	4.13
2008-09-15	0.0264706	0.406824	20.36	0.593176	2.45	14.32	3.69	4.2
2008-10-15	0.0286471	0.442235	13	0.633882	1.17	14.53	3.49	3.73
2008-11-15	0.0314706	0.317176	18.33	1.13	1.35	16.04	4.62	4.88
2008-12-15	0.0322353	0.991687	34.59	1.29	1.86	8.28	3.53	5.26
2009-01-15	0.0272353	1.06	20.59	1.57	1.27	11.15	5.75	4.36
2009-02-15	0.0260588	0.295118	20.2	0.995118	1.29	11.5	3.91	5.75
2009-03-15	0.0311765	0.395529	30.2	1.07	4.68	13.19	4.18	4.66
2009-04-15	0.0289412	0.349529	20.71	1.21	1.69	9.99	2.65	4.71
2009-05-15	0.0283529	0.390176	24.27	1.09	2.06	10.01	3.06	5.52
2009-06-15	0.0322941	0.277529	15.05	0.722059	1.32	6.27	2.88	4.83
2009-07-15	0.0271765	0.278412	22.59	0.784824	2.2	9.4	4.69	4.94
2009-08-15	0.0276471	0.340765	27.85	0.856941	1.9	8.7	3.06	4.55
2009-09-15	0.0277647	0.872059	17.1	0.655941	2.05	8.33	3.06	4.18
2009-10-15	0.0257059	0.335765	22.04	1.28	1.36	10	3.76	4.91
2009-11-15	0.0295294	0.50625	18.05	1.38	1.31	10.61	2.96	5.1
2009-12-15	0.0317647	0.403412	33.72	1.88	1.15	8.4	5.42	5.02
2010-01-15	0.0299412	0.495118	28.2	1.82	1.43	10.43	4.72	4.73
2010-02-15	0.0378235	0.465176	62.45	0.904941	1.4	11.44	5.31	4.54
2010-03-15	0.0307059	0.295588	21.82	0.742059	1.22	10.09	4.25	4.61
2010-04-15	0.0526471	0.392588	18.75	0.720588	1.99	9.79	4.26	4.56
2010-05-15	0.0277647	0.515647	14.46	0.580882	1.83	7.3	4.79	4.34
2010-06-15	0.0244706	0.678882	19.62	0.742188	1.57	7.01	5.99	5.01
2010-07-15	0.0257059	0.588765	17.57	0.517059	2.05	5.24	5.71	5.01
2010-08-15	0.0238235	0.463235	12.52	0.318529	1.11	9.55	6.22	4.73
2010-09-15	0.0301765	0.730941	19.14	0.742176	1.29	6.51	4.44	7.12
2010-10-15	0.0254706	0.445588	13.64	0.801471	1.05	7.93	5.28	3.95
2010-11-15	0.0239412	0.496529	27.25	0.703	1.37	8.09	6.03	4.8
2010-12-15	0.0283529	0.5	27.26	2.15	1.63	7.18	5.82	5.03
2011-01-15	0.0326471	0.499353	39.71	0.911647	1.22	4.89	5.28	4.45
2011-02-15	0.0261765	0.383471	27.76	0.984235	1.51	7.12	3.53	5.91
2011-03-15	0.0255294	0.529059	28.14	1.04	1.24	3.5	6.32	10.38
2011-04-15	0.0318235	0.407353	22.94	1.28	1.69	5.9	6.12	11.23
2011-05-15	0.0302941	0.317824	22.04	1.12	1.43	6.56	5.15	11.12
2011-06-15	0.0371765	0.576941	38.46	1.08	1.16	6.88	4.48	13.59
2011-07-15	0.0297647	0.464412	19.59	0.909941	1.03	7.05	5.11	10.49
2011-08-15	0.0235294	0.532824	24.29	0.647588	1.13	7.82	7.15	9.74
2011-09-15	0.0254118	0.767824	21.04	0.576588	2.76	10.97	5.26	9.87
2011-10-15	0.0241176	0.484235	27.19	0.703118	2.71	9.41	4.78	9.49
2011-11-15	0.0247059	0.416412	26.45	0.696353	1.22	6.16	4.94	9.41
2011-12-15	0.0247059	0.416941	30.42	0.711588	1.82	7.47	6.09	9.65
2012-01-15	0.0273529	0.531765	39.5	1.48	1.83	5.75	6.75	12.22
2012-02-15	0.0242941	0.325824	28.99	0.596235	1.86	3.32	4.74	10.58
2012-03-15	0.0258824	0.275235	30.45	1.11	2.11	5.37	6.06	10.57
2012-04-15	0.0236471	0.395647	18.36	0.968118	1.87	5.42	3.72	12.69
2012-05-15	0.0286471	0.446941	17.92	0.911059	2.99	7.72	5.37	12.55
2012-06-15	0.0243529	0.528647	17.71	0.726176	2.51	6.89	6.13	13.04
2012-07-15	0.029	0.336471	11.72	0.453235	2.32	6.17	3.29	10.25
2012-08-15	0.0294118	0.294706	18.75	0.922647	2.24	5.97	4.45	9.85
2012-09-15	0.0218235	0.260882	25.46	0.645	0.749118	7.29	4.81	6.46
2012-10-15	0.0273529	0.276235	23.44	0.544941	2.54	6.81	5.35	10.86
2012-11-15	0.0236471	0.424706	26.59	0.807235	2.31	6.21	4.65	7.37
2012-12-15	0.0232941	0.350118	31.36	0.443118	0.829353	5.24	4.87	6.38
2013-01-15	0.0279412	0.318118	27.89	1.54	1.05	5.69	4.53	9.34
2013-02-15	0.0296471	1.27	21.61	0.807294	1.13	4.04	4.47	6.06
2013-03-15	0.0214118	0.233353	18.13	0.878471	1.42	4.53	4.26	7.56
2013-04-15	0.0204706	0.282118	14.26	0.780353	1.64	8.81	3.95	6.67
2013-05-15	0.0227647	0.205706	14.78	0.727882	2.12	5.94	4.34	7.46
2013-06-15	0.0198235	0.391647	15.79	0.411235	2.56	8.67	5.97	6.35
2013-07-15	0.0212353	0.303941	16.63	0.438235	1.64	5.64	4.22	5.82
2013-08-15	0.0224706	0.364941	9.19	0.465412	1.65	5.48	4.43	5.93
2013-09-15	0.0202941	0.276118	16.47	0.257412	0.998235	5.14	4.46	6.03
2013-10-15	0.0195294	0.357941	10.11	0.340941	1.23	7.38	4.18	6.02
2013-11-15	0.0226471	0.369118	9.31	0.550824	0.814882	5.62	3.24	5.84
2013-12-15	0.0287059	0.277235	15.63	0.774765	1.63	7.54	3.06	7.44
2014-01-15	0.0191765	0.337588	18.59	0.678235	1.31	3.48	4.82	6.51
2014-02-15	0.0211765	0.306235	18.36	0.689588	1.55	4.48	4.12	6.93
2014-03-15	0.0203529	0.200176	22.18	0.582529	0.719118	4.38	4.53	5.7
2014-04-15	0.0247059	0.383294	28.53	0.424412	1.32	4.97	5.81	7.24
2014-05-15	0.0207059	0.400235	14.72	0.242706	1.19	3.85	3.46	6.62
2014-06-15	0.0242353	0.348294	24	0.209412	1.07	6.05	4.89	6.27
2014-07-15	0.0238824	0.522118	16.08	0.211529	2.07	5.01	3.74	6.16
2014-08-15	0.0256471	0.262294	13.15	0.357294	2.52	8.07	3.88	6.65
2014-09-15	0.0206471	0.257941	10.93	0.493412	0.832	6.97	5.41	6.11
2014-10-15	0.0235294	0.295882	16.32	0.294412	1.5	7.79	4.63	6.2
2014-11-15	0.0265294	0.263824	11.55	0.227765	0.655294	6.21	4.32	5.53
2014-12-15	0.0284706	0.295235	13.69	0.432294	1.01	9.55	3.72	6
2015-01-15	0.0302353	0.307235	13.82	0.411647	0.632353	4.81	4.43	6.99
2015-02-15	0.0228235	0.384176	13.1	0.613294	0.819471	3.89	3.14	7.43
2015-03-15	0.0258824	0.656118	11.81	0.510235	0.986412	5.11	2.89	6.26
2015-04-15	0.0238824	0.373412	14.85	0.364882	0.853588	3.94	3.51	6.23
2015-05-15	0.0247059	0.344235	12.34	0.229235	1.09	8.61	3.29	6
2015-06-15	0.0215882	0.314294	12.04	0.308176	1.17	5.88	3.06	5.77
2015-07-15	0.0191176	0.299176	7.39	0.672471	1.69	6.06	2.94	5.82
2015-08-15	0.0160588	0.262294	12.83	0.188	1.22	5.76	2.75	6.23
2015-09-15	0.0195294	0.294824	11.19	0.230824	1.05	6.7	2.98	7.6
2015-10-15	0.0194118	0.228	12.71	0.182882	0.926588	7.88	2.78	6.34
2015-11-15	0.0189412	0.308118	11.4	0.249941	1.34	7.66	3.04	6.05
2015-12-15	0.0196471	0.246294	9.31	0.234235	1.48	6.26	3.29	7.74
2016-01-15	0.0231176	0.265176	10.87	0.270588	1.6	5.87	2.82	13.82
2016-02-15	0.0187647	0.376588	15.12	0.308118	1.43	5.47	3.18	6.25
2016-03-15	0.0151176	0.357294	15.48	0.244588	0.885118	5.61	2.98	5.64
2016-04-15	0.0202353	0.201706	14.51	0.173647	1.22	5.46	2.34	3.08
2016-05-15	0.0184118	0.522882	20.78	0.210882	1.18	4.02	2.42	3.32
2016-06-15	0.0147059	0.352294	15.11	0.144765	1.54	5.21	2.38	4.42
2016-07-15	0.0147059	0.247059	10.34	0.149412	1.47	3.78	2	2.92
2016-08-15	0.0152941	0.278353	13.34	0.134706	1.78	9.05	2	2.9
2016-09-15	0.0152941	0.326	14.88	0.203294	1.18	5.01	2	2.37
2016-10-15	0.0206471	0.219059	8.82	0.198706	1.29	5.08	2.28	3.32
2016-11-15	0.0218824	0.369588	11.84	0.293941	1.28	7.22	2	1.73
2016-12-15	0.017	0.283118	9.68	0.309059	1.27	8.01	2	2.42
